# Supplementary material
Source: PubMed Central journal article supplement (PMC1629065)
Supplement: rsbl20040270s02.pdf [file rsbl20040270s02.pdf]

## **ELECTRONIC APPENDIX**

This is the Electronic Appendix to the article

High dispersal in a frog species suggests that it is  
vulnerable to habitat fragmentation

by

W. Chris Funk, Allison E. Greene, Paul Stephen Corn and Fred W. Allendorf

*Biol. Lett.* (doi:10.1098/rsbl.2004.0270)

Electronic appendices are refereed with the text; however, no attempt is made  
to impose a uniform editorial style on the electronic appendices.

## Appendix A (Electronic appendix)

Table 1. Best-supported multistate capture-recapture models ( $\Delta AIC_c \leq 4$ ) used to examine variation in survival and capture probabilities of Columbia spotted frogs.

(Models include annual ( $i$ ) and population ( $r$ ) variation in survival ( $S$ ) and capture ( $p$ ) probabilities of juvenile ( $j$ ) and adult ( $a$ ) frogs. Movement probabilities between lower and upper populations are year- and population-specific in all models. Abbreviations:  $\Delta AIC_c$ , difference between the Akaike information criterion value ( $AIC_c$ ) of the given model and the model with the lowest  $AIC_c$ ;  $K$ , number of parameters in the model.)

| Basin        | Model                           | $\Delta AIC_c$ | $AIC_c$ weight | $K$ |
|--------------|---------------------------------|----------------|----------------|-----|
| Keeler Creek | $S_{ji}S_{ai}p_j p_a^r$         | 0.00           | 0.39           | 33  |
|              | $S_{ji}S_{ai} p_j^r p_a^r$      | 0.37           | 0.32           | 34  |
|              | $S_j S_a^r p_{ji}^r p_{ai}^r$   | 3.25           | 0.08           | 39  |
|              | $S_j S_a p_{ji}^r p_{ai}^r$     | 3.54           | 0.07           | 38  |
|              | $S_j S_{ai} p_{ji}^r p_{ai}^r$  | 3.75           | 0.06           | 40  |
| Marten Creek | $S_j^r S_a^r p_{ji}^r p_{ai}^r$ | 0.00           | 0.19           | 40  |
|              | $S_j^r S_a p_{ji}^r p_{ai}^r$   | 0.37           | 0.16           | 39  |
|              | $S_j^r S_a^r p_{ji} p_{ai}$     | 0.56           | 0.14           | 34  |
|              | $S_{ji}^r S_{ai}^r p_j p_a$     | 1.02           | 0.11           | 38  |
|              | $S_j^r S_a^r p_j p_{ai}$        | 1.71           | 0.08           | 32  |
|              | $S_{ji}^r S_{ai}^r p_j p_{ai}$  | 1.81           | 0.08           | 40  |

|                               |      |      |    |
|-------------------------------|------|------|----|
| $S_{ji}^r S_{ai}^r p_j^r p_a$ | 2.67 | 0.05 | 39 |
| $S_{ji}^r S_{ai}^r p_j p_a^r$ | 2.85 | 0.05 | 39 |

---

Table 2. Best-supported multistate capture-recapture models ( $\Delta AIC_c \leq 4$ ) used to examine variation in movement probabilities of Columbia spotted frogs.

(Models include annual ( $i$ ) and population ( $rs$ ) variation in movement ( $\Psi$ ) probabilities of juvenile ( $j$ ) and adult ( $a$ ) frogs. In Keeler Creek, survival probability is year-specific for juveniles ( $S_{ji}$ ) and adults ( $S_{ai}$ ) and capture probability is constant for juveniles and population-specific for adults ( $p_a^r$ ). In Marten Creek, survival probability is population-specific for juveniles ( $S_j^r$ ) and adults ( $S_a^r$ ) and capture probability is year- and population-specific for juveniles ( $p_{ji}^r$ ) and adults ( $p_{ai}^r$ ). Abbreviations:  $\Delta AIC_c$ , difference between the Akaike information criterion value ( $AIC_c$ ) of the given model and the model with the lowest  $AIC_c$ ;  $K$ , number of parameters in the model.)

| Basin        | Model                        | $\Delta AIC_c$ | $AIC_c$ weight | $K$ |
|--------------|------------------------------|----------------|----------------|-----|
| Keeler Creek | $\Psi_{ji} \Psi_a$           | 0.00           | 0.61           | 19  |
|              | $\Psi_{ji} \Psi_a^{rs}$      | 2.03           | 0.22           | 20  |
| Marten Creek | $\Psi_{ji}^{rs} \Psi_a$      | 0.00           | 0.62           | 35  |
|              | $\Psi_{ji}^{rs} \Psi_a^{rs}$ | 2.02           | 0.22           | 36  |

Table 3. Multistate capture-recapture estimates for Columbia spotted frogs from Keeler Creek, Montana.

(Annual survival ( $S$ ), capture ( $p$ ), and movement ( $\Psi$ ) probabilities were estimated for juveniles ( $j$ ) and adults ( $a$ ) for the lower ( $l$ ) and upper ( $u$ ) populations in Keeler Creek from 2000 to 2003 using the best-fitting multistate model (table 2). Movement probabilities are both population- ( $rs$ ) and stage-specific.)

| Parameter               | Estimate | Standard Error | Lower 95% CI | Upper 95% CI |
|-------------------------|----------|----------------|--------------|--------------|
| $S_{j_{2000}}$          | 0.32     | 0.11           | 0.15         | 0.55         |
| $S_{j_{2001}}$          | 0.85     | 0.31           | 0.05         | 1.00         |
| $S_{j_{2002}}$          | 0.25     | 0.11           | 0.10         | 0.51         |
| $S_{a_{2000}}$          | 0.56     | 0.05           | 0.46         | 0.67         |
| $S_{a_{2001}}$          | 0.77     | 0.07           | 0.62         | 0.88         |
| $S_{a_{2002}}$          | 1.00     | 0.00           | 0.99         | 1.00         |
| $p_j$                   | 0.02     | 0.01           | 0.01         | 0.04         |
| $p_a^l$                 | 0.24     | 0.03           | 0.19         | 0.31         |
| $p_a^u$                 | 0.50     | 0.04           | 0.43         | 0.57         |
| $\Psi_{2000}^{r_j s_j}$ | 0.29     | 0.12           | 0.12         | 0.56         |
| $\Psi_{2001}^{r_j s_j}$ | 0.00     | 0.00           | 0.00         | 0.00         |
| $\Psi_{2002}^{r_j s_j}$ | 0.49     | 0.19           | 0.18         | 0.81         |
| $\Psi_{2000}^{r_j r_a}$ | 0.09     | 0.05           | 0.03         | 0.24         |

|                          |      |                |      |      |      |
|--------------------------|------|----------------|------|------|------|
| $\Psi_{2001}^{r_j r_a}$  | 0.03 | $\Psi_{2001}$  | 0.02 | 0.01 | 0.10 |
| $\Psi_{2002}^{r_j r_a}$  | 0.18 | $\Psi_{2002}$  | 0.10 | 0.06 | 0.44 |
| $\Psi_{2000}^{r_j s_a}$  | 0.00 | $\Psi_{2000}$  | 0.00 | 0.00 | 0.00 |
| $\Psi_{2001}^{r_j s_a}$  | 0.00 | $\Psi_{2001}$  | 0.00 | 0.00 | 0.00 |
| $\Psi_{2002}^{r_j s_a}$  | 0.00 | $\Psi_{2002}$  | 0.00 | 0.00 | 0.00 |
| $\Psi_{a s_a}^{r_a s_a}$ | 0.00 | $\Psi_{a s_a}$ | 0.00 | 0.00 | 0.00 |

---

Table 4. Multistate capture-recapture estimates for Columbia spotted frogs from Marten Creek, Montana.

(Annual survival ( $S$ ), capture ( $p$ ), and movement ( $\Psi$ ) probabilities were estimated for juveniles ( $j$ ) and adults ( $a$ ) for the lower ( $l$ ) and upper ( $u$ ) populations in Marten Creek from 2000 to 2003 using the best-fitting multistate model (table 2).)

| Parameter        | Estimate | Standard Error | Lower 95% CI | Upper 95% CI |
|------------------|----------|----------------|--------------|--------------|
| $S_j^l$          | 0.27     | 0.04           | 0.20         | 0.35         |
| $S_j^u$          | 0.11     | 0.02           | 0.07         | 0.16         |
| $S_a^l$          | 0.48     | 0.05           | 0.38         | 0.58         |
| $S_a^u$          | 0.65     | 0.11           | 0.43         | 0.83         |
| $P_{j_{2001}}^l$ | 0.32     | 0.20           | 0.07         | 0.75         |
| $P_{j_{2002}}^l$ | 0.25     | 0.07           | 0.14         | 0.42         |
| $P_{j_{2003}}^l$ | 0.16     | 0.04           | 0.09         | 0.25         |
| $P_{j_{2002}}^u$ | 0.17     | 0.07           | 0.07         | 0.36         |
| $P_{j_{2003}}^u$ | 1.00     | 0.00           | 0.99         | 1.00         |
| $P_{a_{2001}}^l$ | 0.15     | 0.03           | 0.10         | 0.21         |
| $P_{a_{2002}}^l$ | 0.24     | 0.04           | 0.17         | 0.33         |
| $P_{a_{2003}}^l$ | 0.24     | 0.05           | 0.16         | 0.34         |
| $P_{a_{2001}}^u$ | 0.17     | 0.06           | 0.08         | 0.33         |

|                         |      |      |      |      |
|-------------------------|------|------|------|------|
| $P_{a_{2002}}^u$        | 0.25 | 0.06 | 0.15 | 0.39 |
| $P_{a_{2003}}^u$        | 0.35 | 0.09 | 0.19 | 0.54 |
| $\Psi_{2000}^{l_j u_j}$ | 0.03 | 0.10 | 0.00 | 0.93 |
| $\Psi_{2001}^{l_j u_j}$ | 0.05 | 0.03 | 0.01 | 0.16 |
| $\Psi_{2002}^{l_j u_j}$ | 0.00 | 0.00 | 0.00 | 0.00 |
| $\Psi_{2000}^{l_j l_a}$ | 0.56 | 0.13 | 0.31 | 0.79 |
| $\Psi_{2001}^{l_j l_a}$ | 0.36 | 0.08 | 0.22 | 0.54 |
| $\Psi_{2002}^{l_j l_a}$ | 0.27 | 0.08 | 0.15 | 0.44 |
| $\Psi_{2000}^{l_j u_a}$ | 0.09 | 0.04 | 0.03 | 0.21 |
| $\Psi_{2001}^{l_j u_a}$ | 0.04 | 0.02 | 0.02 | 0.09 |
| $\Psi_{2002}^{l_j u_a}$ | 0.02 | 0.01 | 0.01 | 0.07 |
| $\Psi_{2000}^{u_j l_j}$ | 0.29 | 0.25 | 0.04 | 0.81 |
| $\Psi_{2001}^{u_j l_j}$ | 0.03 | 0.03 | 0.00 | 0.23 |
| $\Psi_{2002}^{u_j l_j}$ | 0.18 | 0.14 | 0.04 | 0.58 |
| $\Psi_{2000}^{u_j u_a}$ | 0.25 | 0.13 | 0.07 | 0.57 |
| $\Psi_{2001}^{u_j u_a}$ | 0.25 | 0.10 | 0.11 | 0.48 |
| $\Psi_{2002}^{u_j u_a}$ | 0.56 | 0.15 | 0.28 | 0.80 |
| $\Psi_{2000}^{u_j l_a}$ | 0.33 | 0.18 | 0.09 | 0.71 |
| $\Psi_{2001}^{u_j l_a}$ | 0.00 | 0.00 | 0.00 | 0.00 |



|                     |      |        |      |      |      |
|---------------------|------|--------|------|------|------|
| $\Psi_{2002}^{u/a}$ | 0.07 | $\Psi$ | 0.07 | 0.01 | 0.39 |
| $\Psi^{r/s_a}$      | 0.00 | $\Psi$ | 0.00 | 0.00 | 0.00 |

---
